# Supplementary material for: FTO Inhibits Epithelial Ovarian Cancer Progression by Destabilising SNAI1 mRNA through IGF2BP2
Source: MDPI journal article supplement (doi:10.3390/cancers14215218), 2022-10-25

OVCA3 (Left: LV-FTO, right: LV-nc)  
vimentin

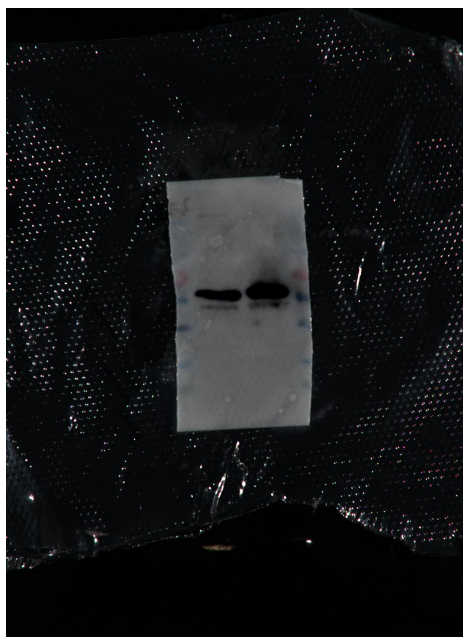

N-cadherin

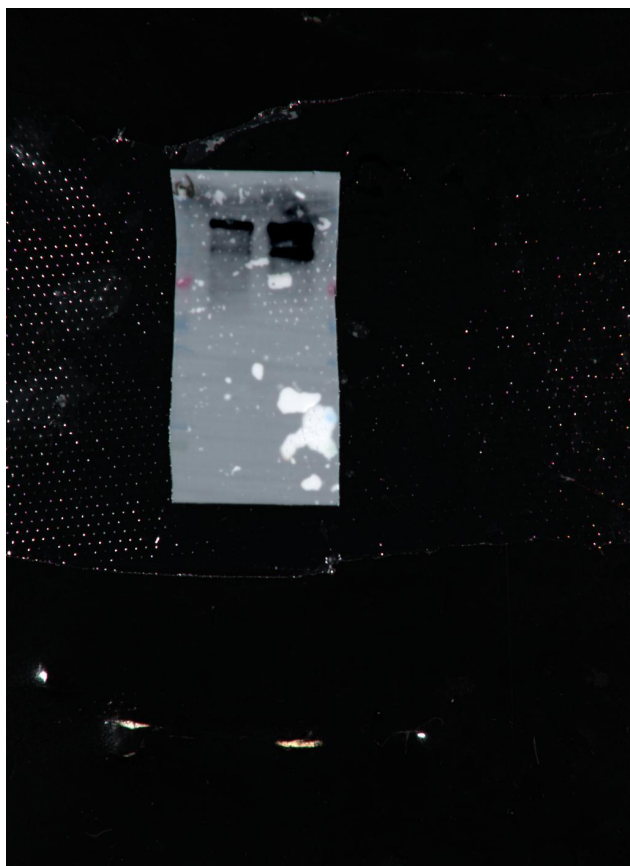

FTO(up)+GAPDH(middle)+SNAIL(down)

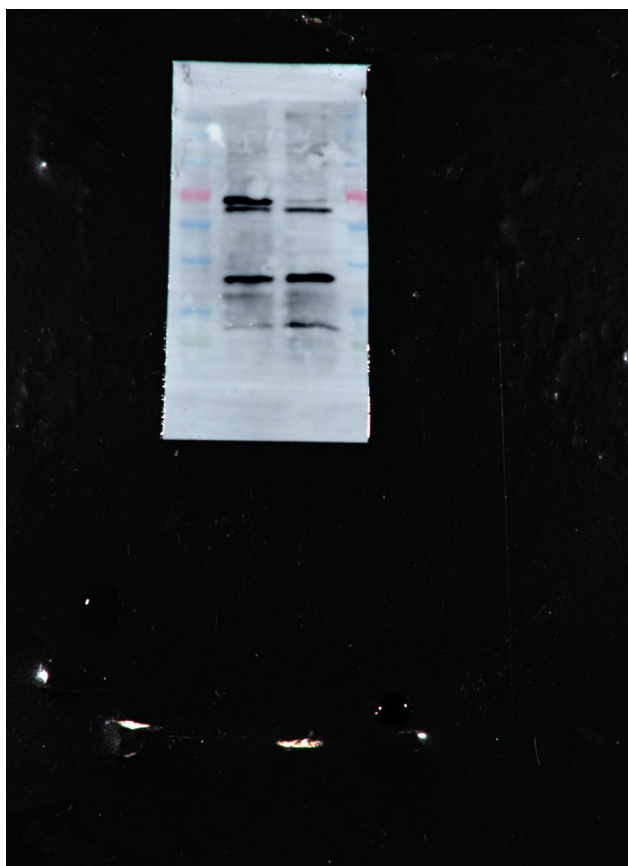

E-cadherin(up)+GAPDH(down)

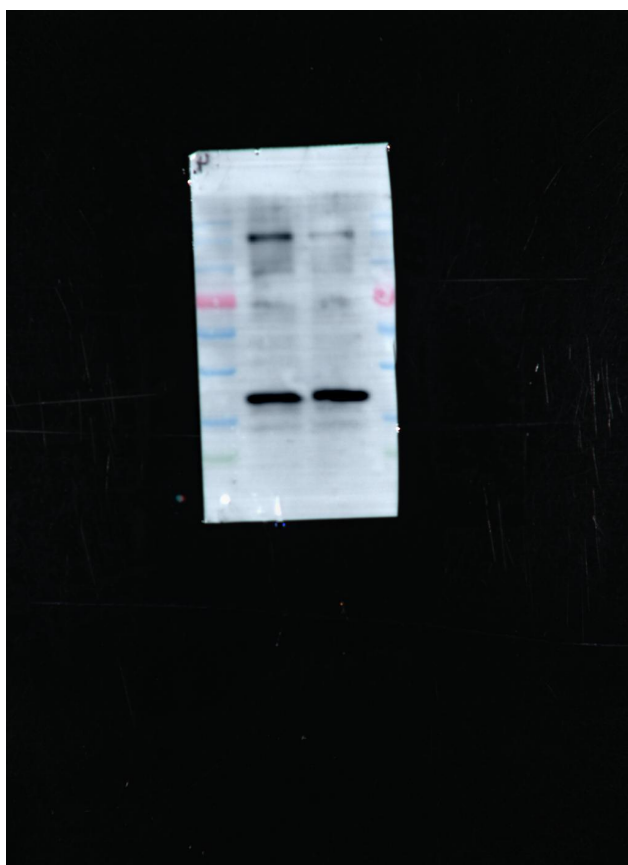

A2780 (Left: LV-FTO, right: LV-nc)  
vimentin

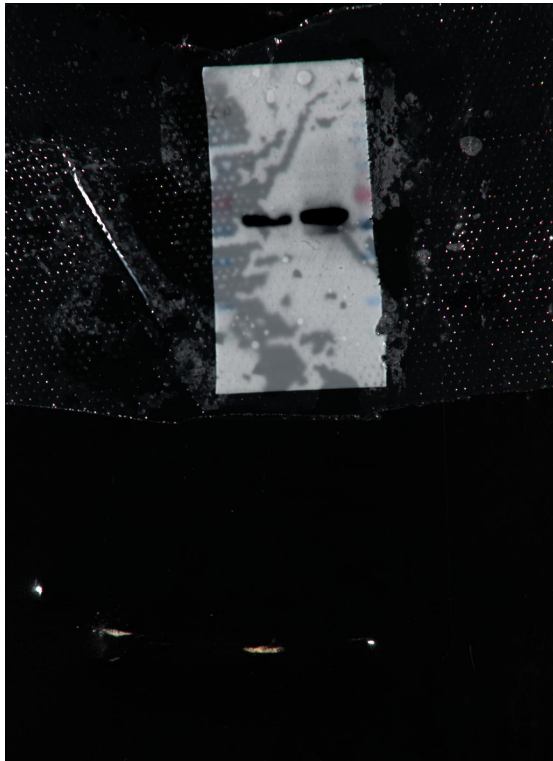

N-cadherin

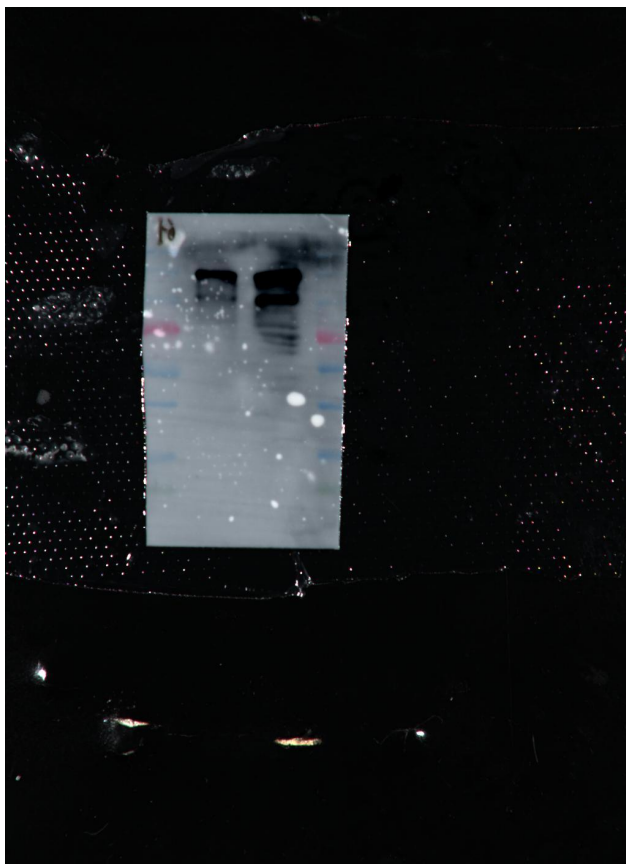

FTO(UP)+SNAIL(down)

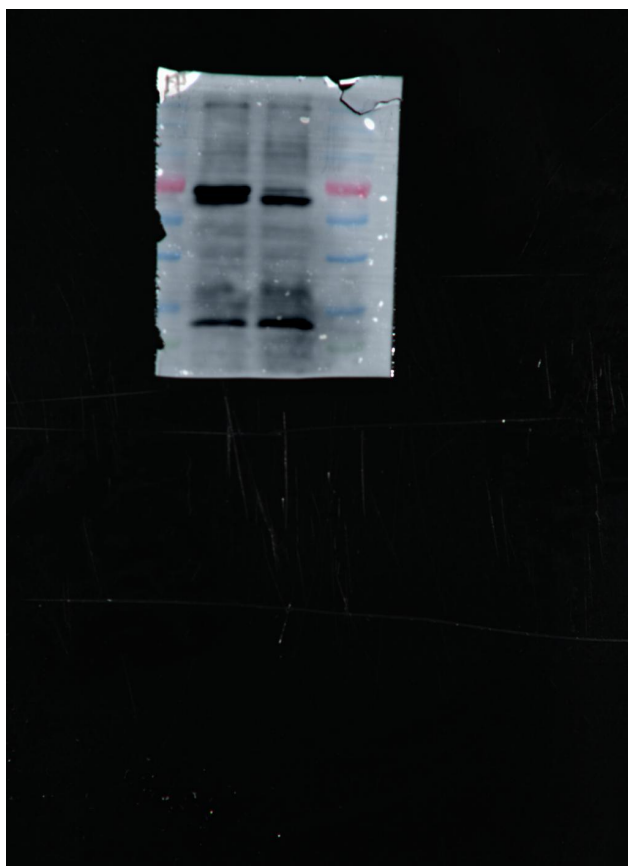

E-cadherin(up)+GAPDH(down)

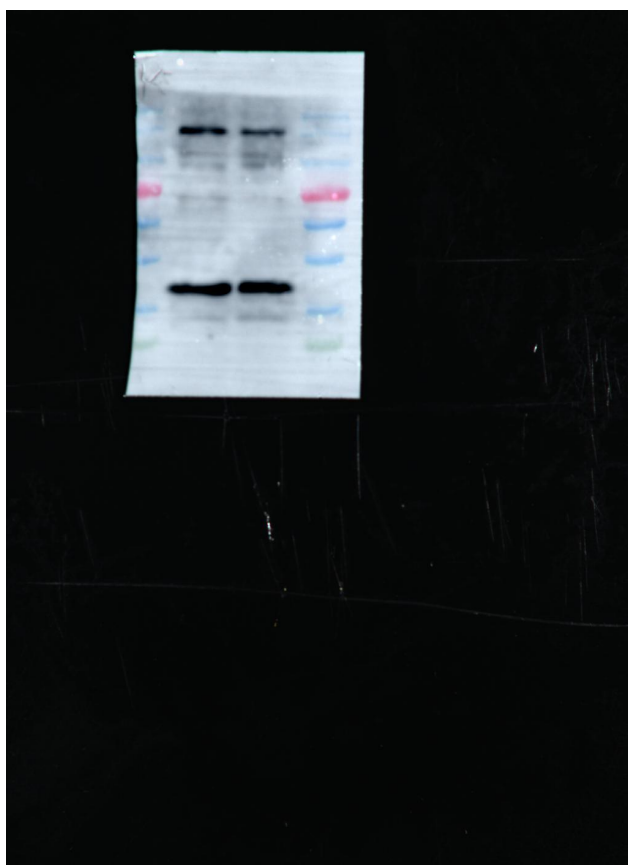



OVCAR3 (From left to right: si-NC, si-FTO#1, si-FTO#2)

N-cadherin

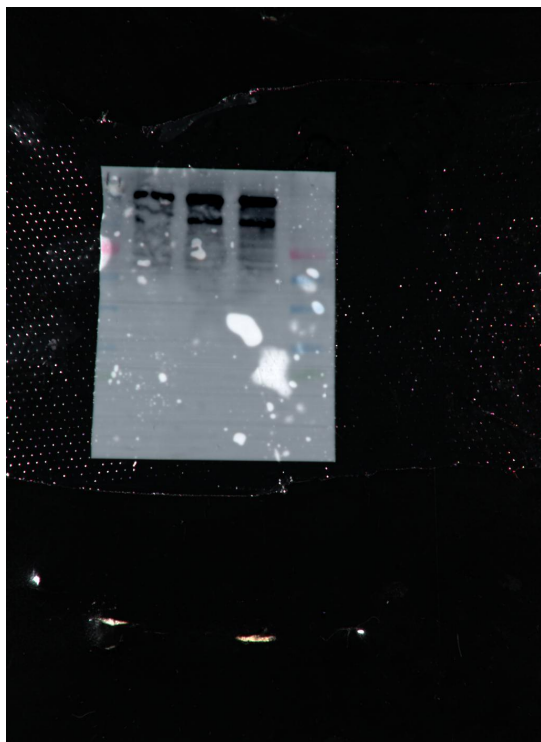

GAPDH

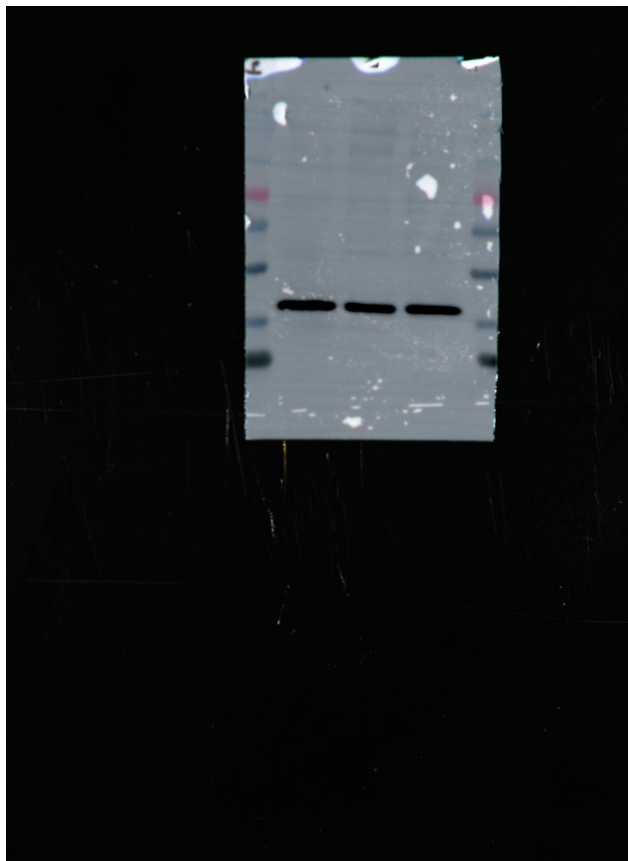

FTO

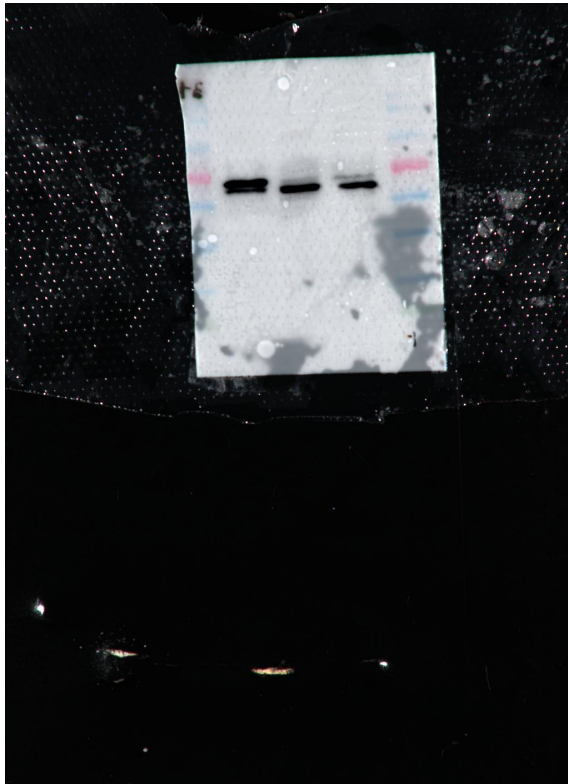

E-cadherin(up)

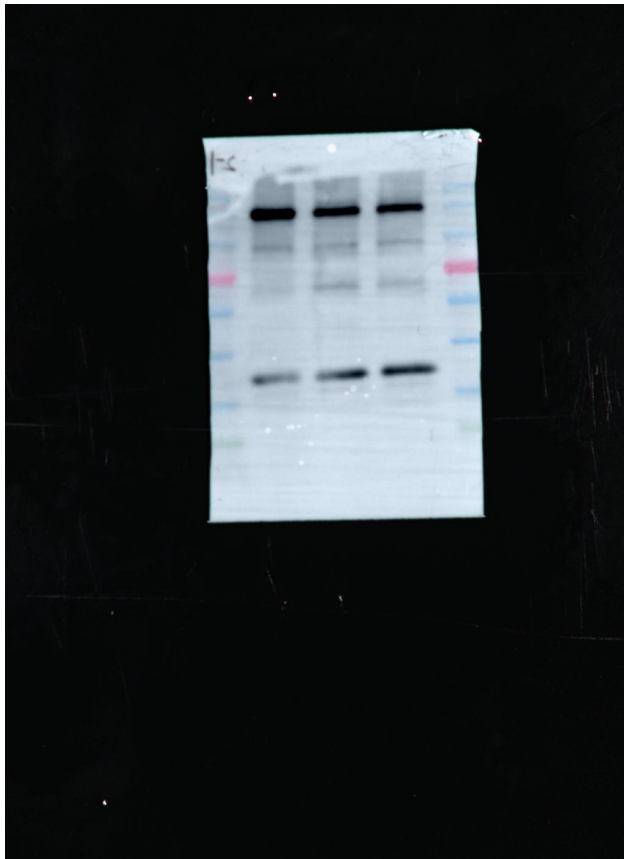

vimentin

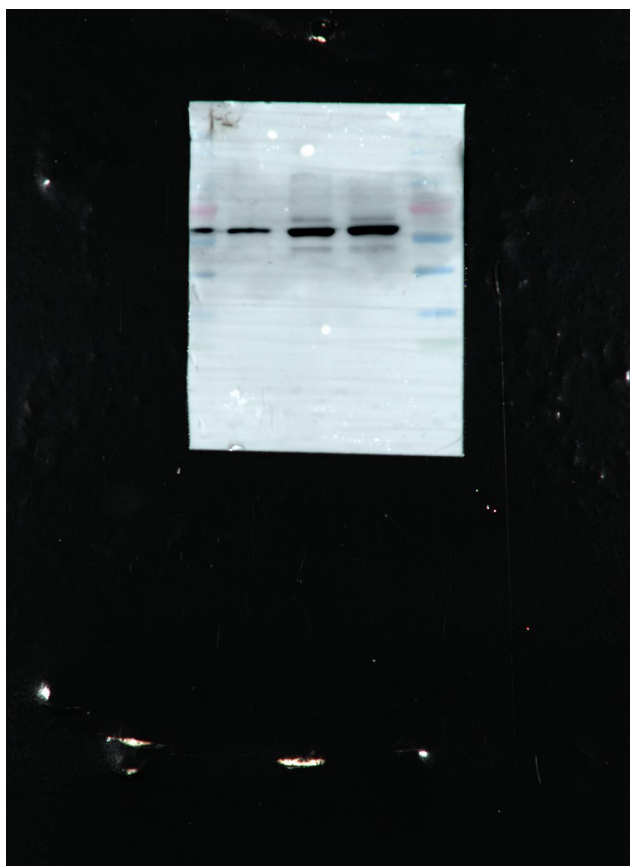

A2780(From left to right: si-NC, si-FTO#1, si-FTO#2)  
vimentin

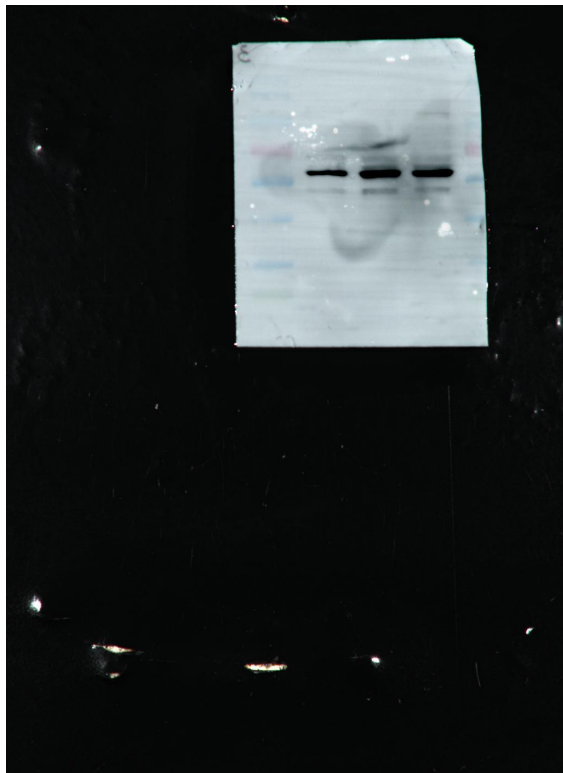

N-cadherin(up)

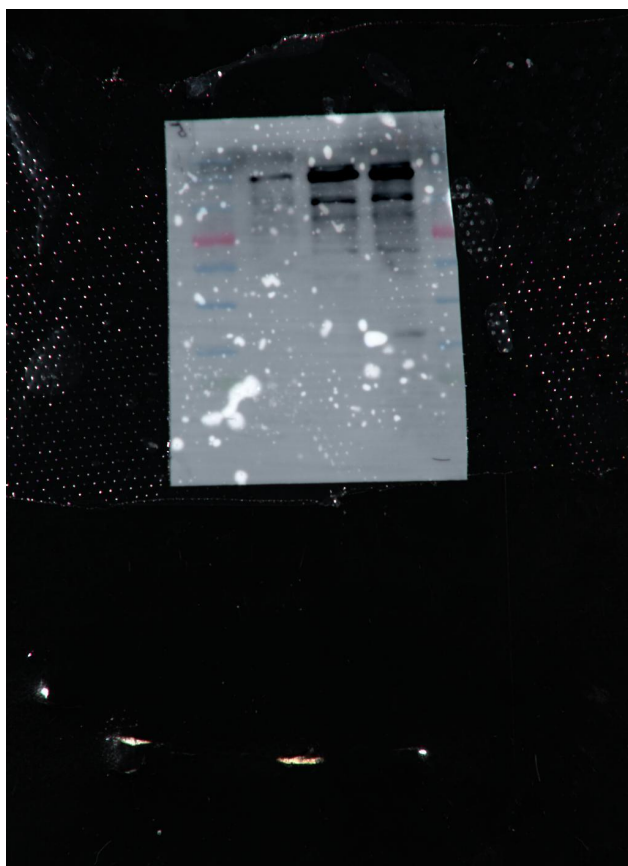

GAPDH

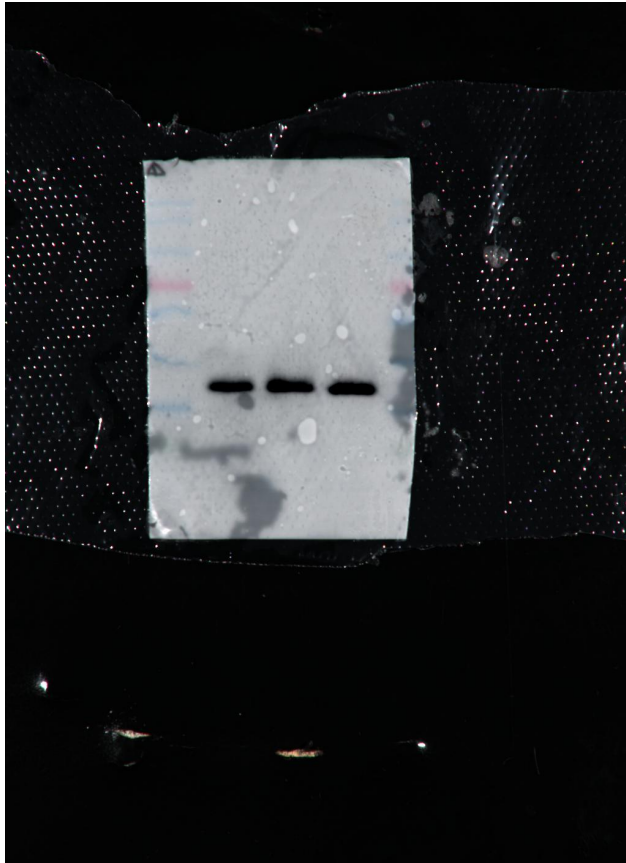

FTO

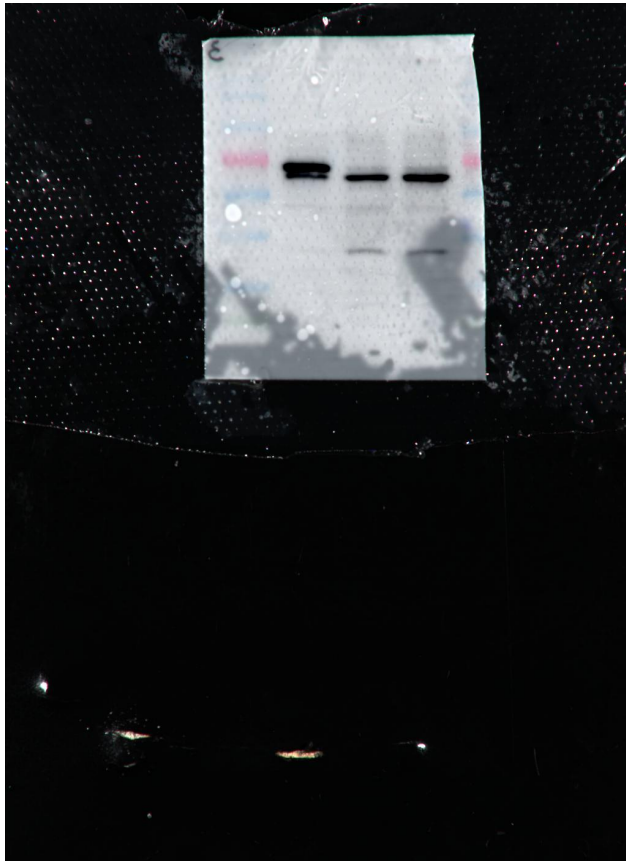

E-cadherin(up)

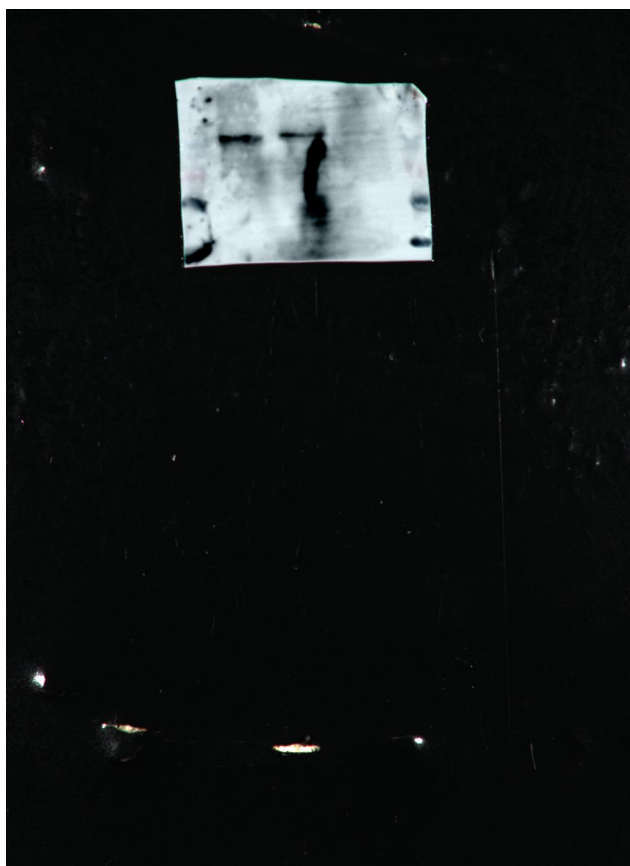

Figure1a

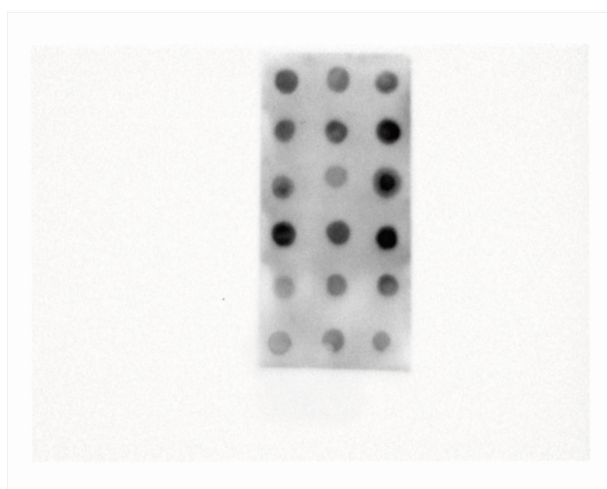

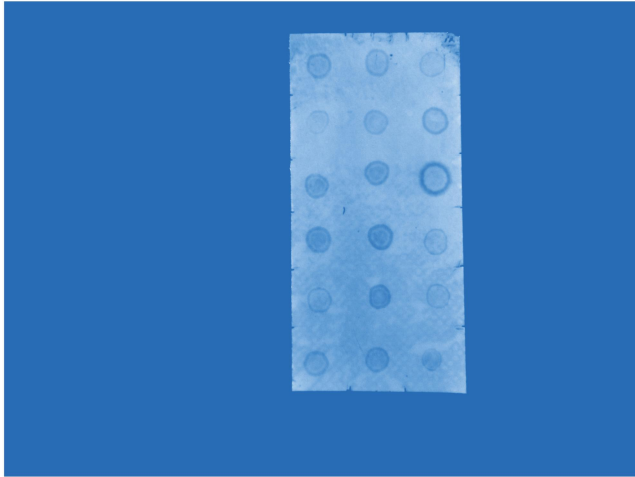

Figure1f

FTO

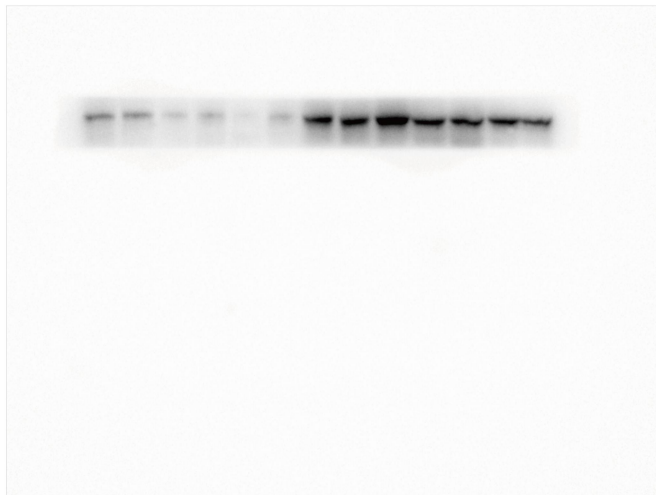

GAPDH

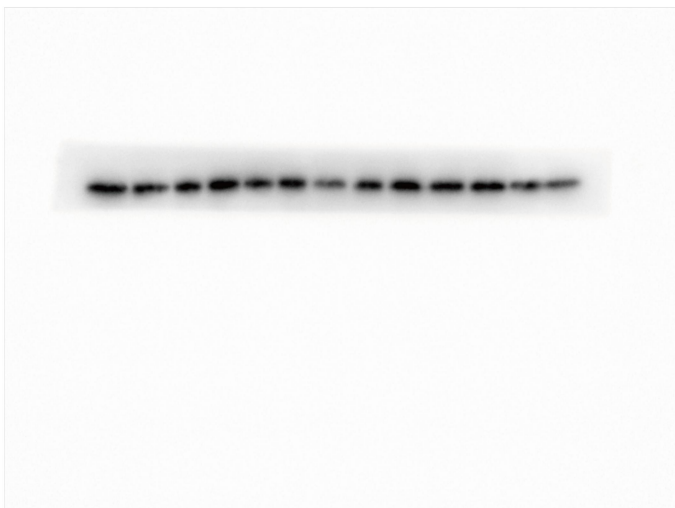



Figure 2b

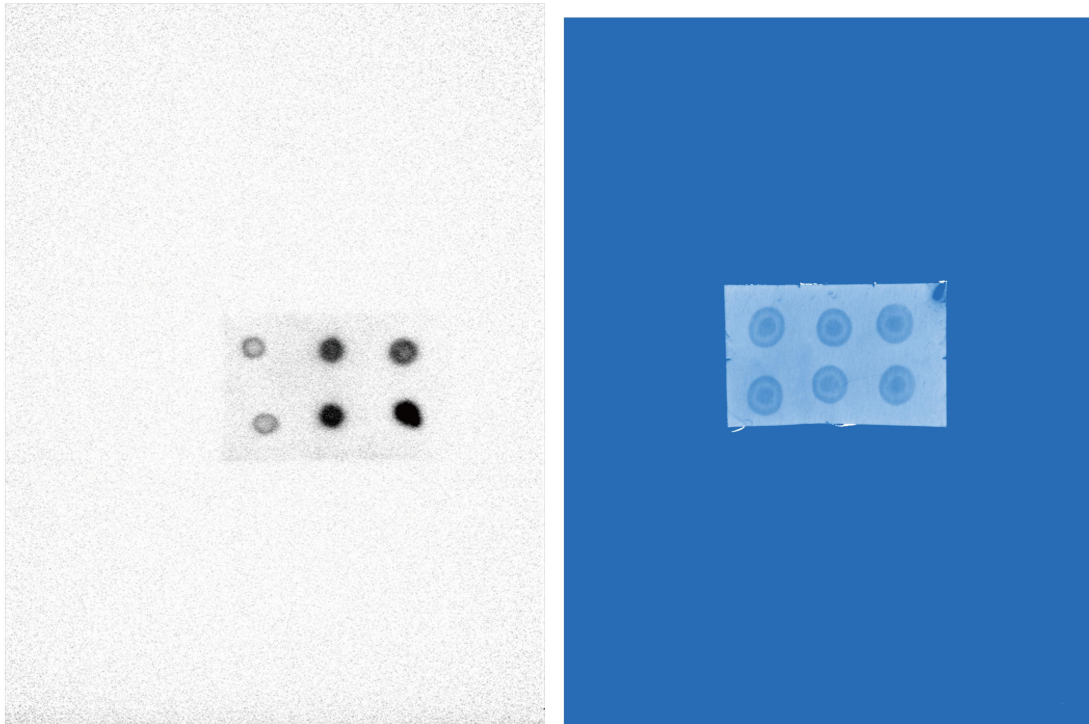

Figure 2g

A2780

E-cadherin

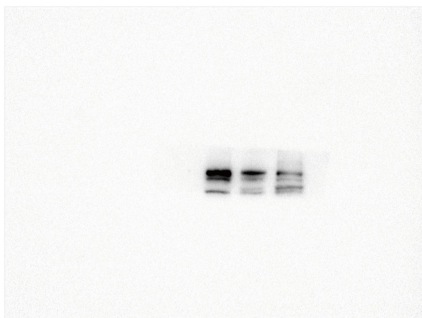

N-cadherin

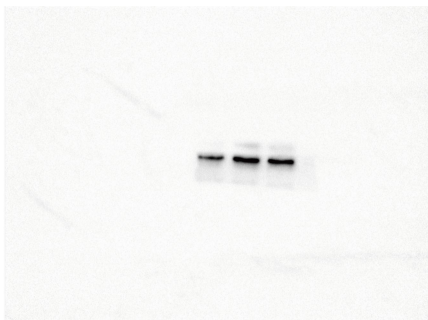

vimentin

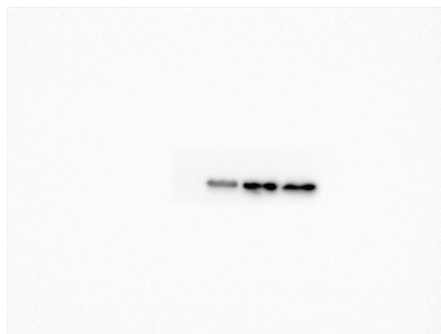

FTO

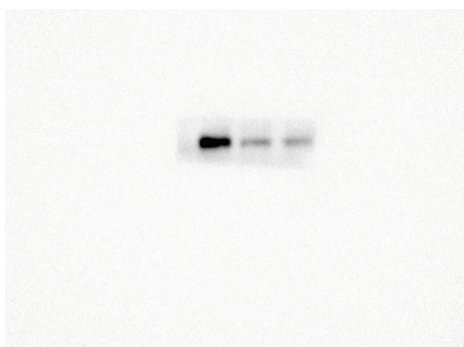

GAPDH

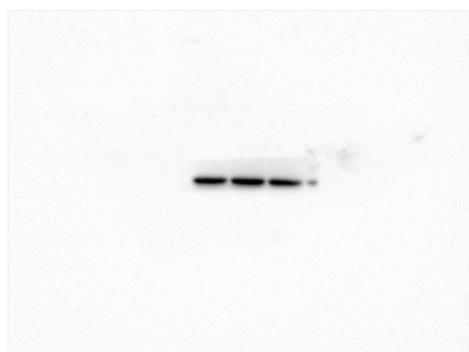

Figure 2g

OVCAR3

E-Cadherin

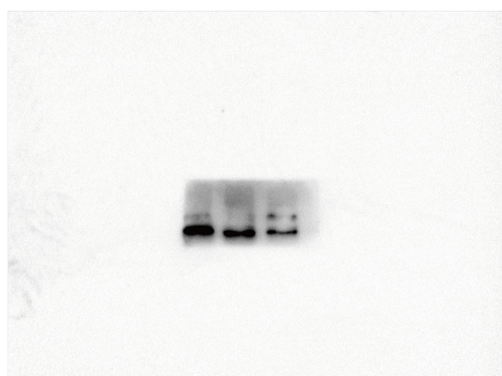

N-cadherin

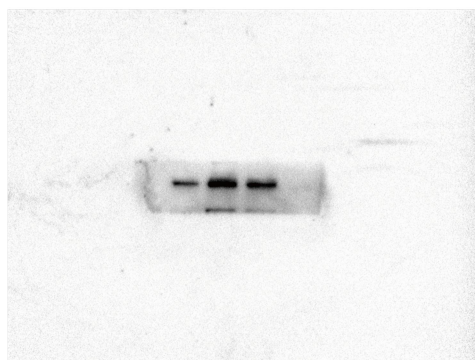

vimentin

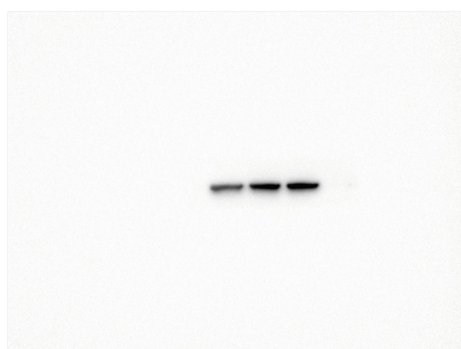

FTO

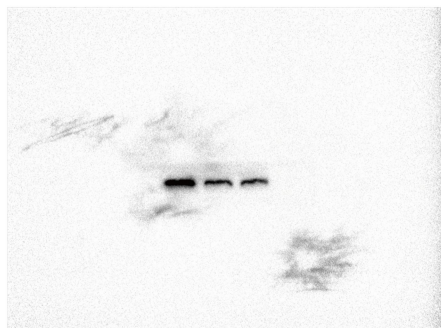

GAPDH

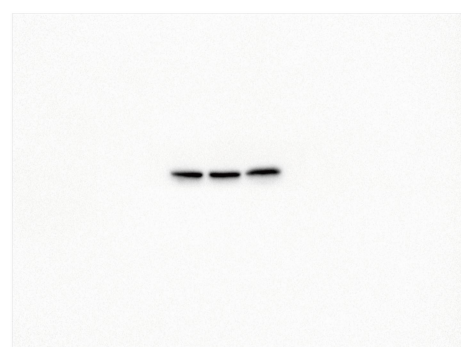

Figure 3b  
A2780

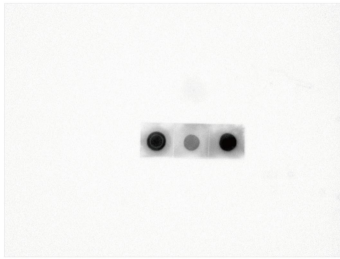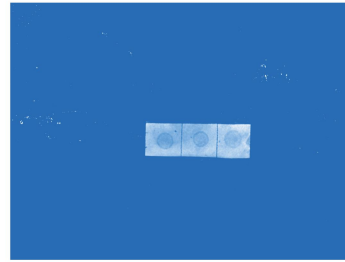

OVCAR3

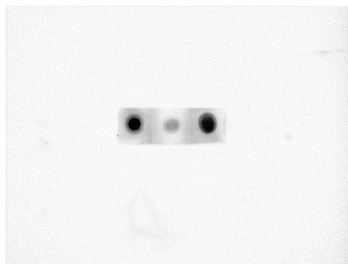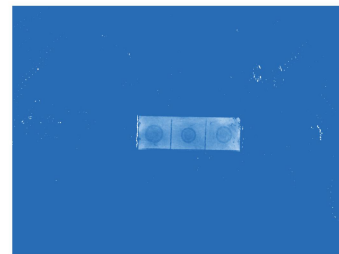

Figure3g  
A2780  
N-cadherin

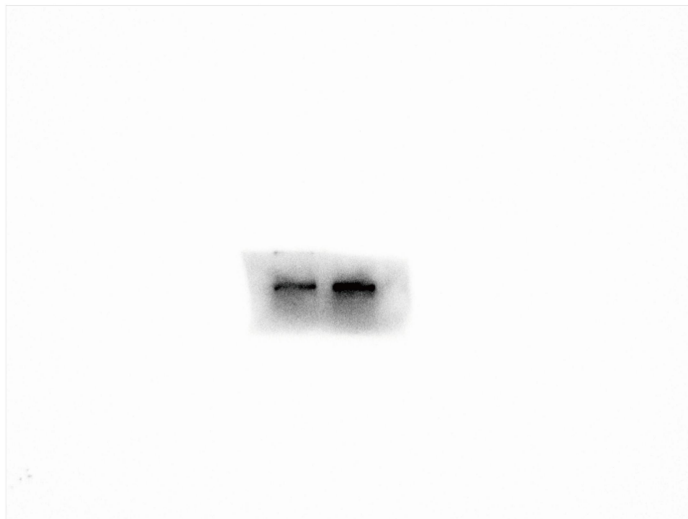

GAPDH

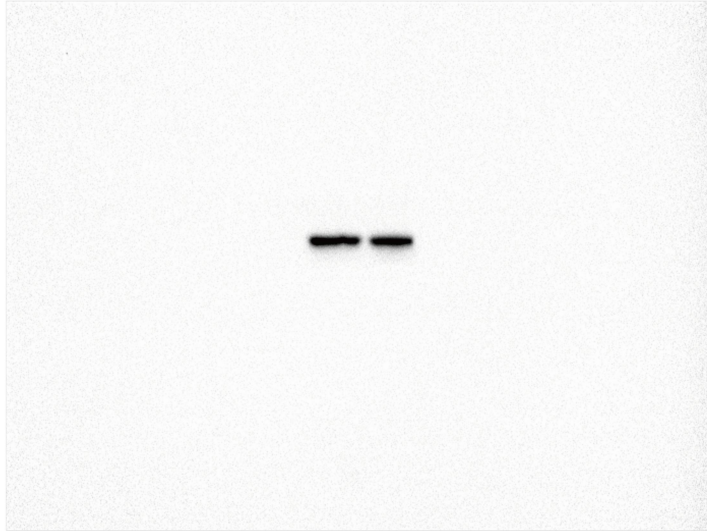

FTO

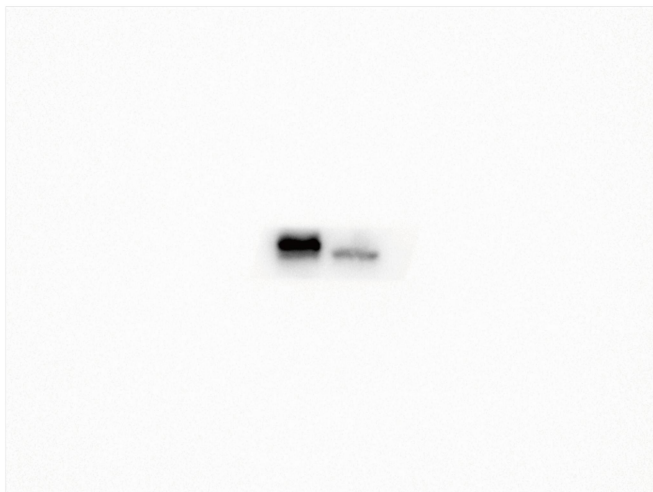

E-cadherin

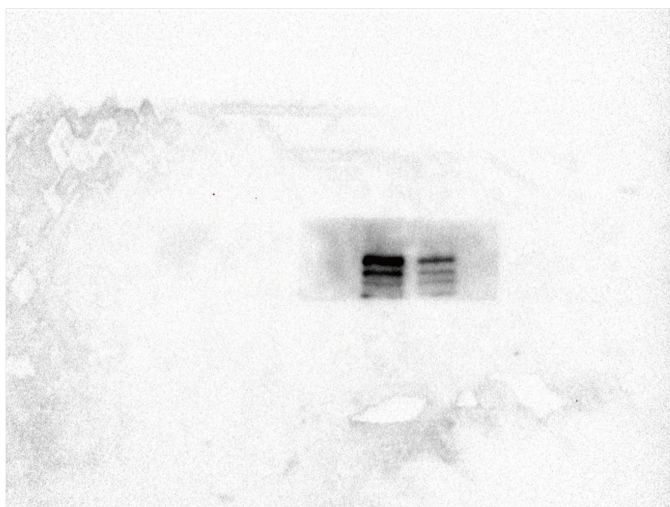

vimentin

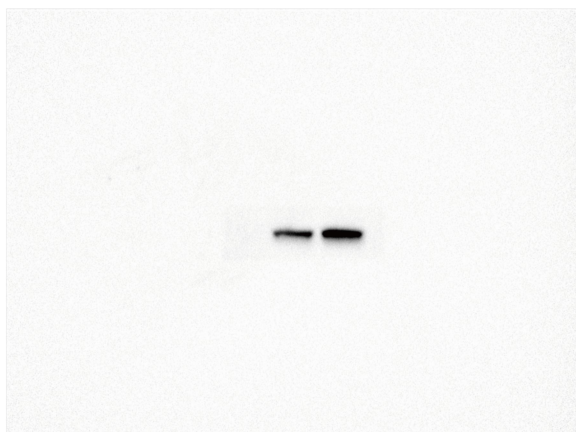

Figure3g

OVCAR3

N-cadherin

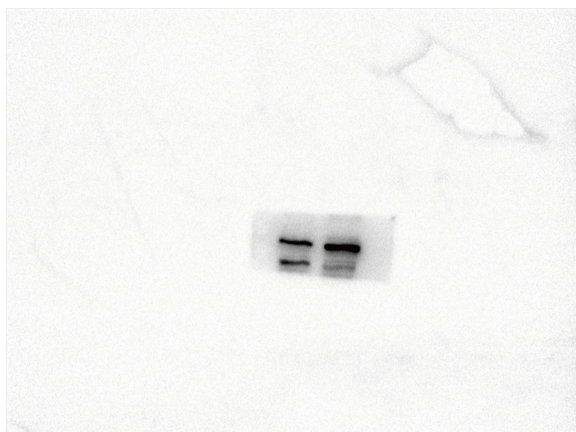

GAPDH

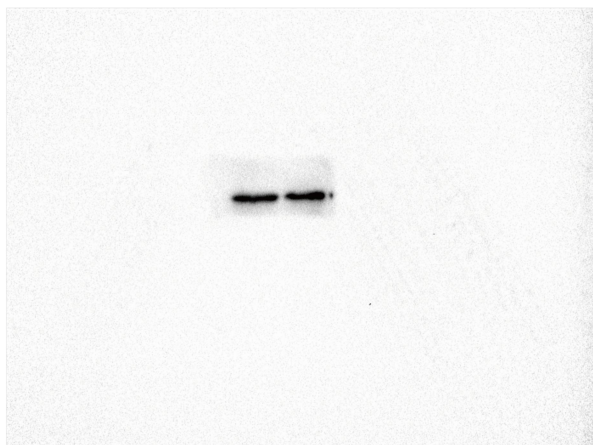



FTO

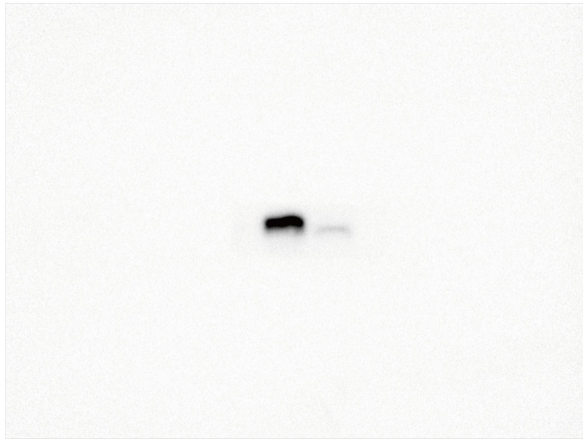

E-cadherin

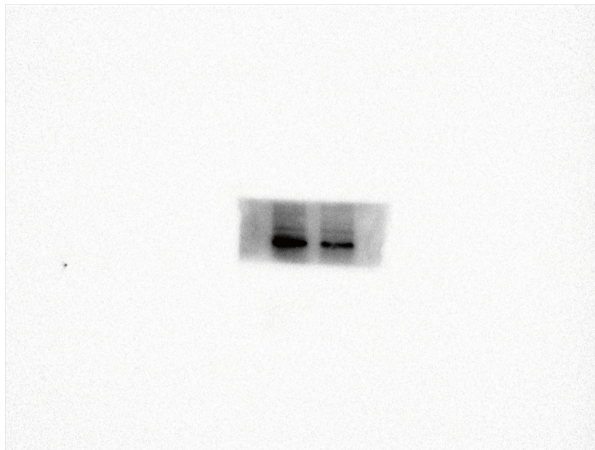

vimentin

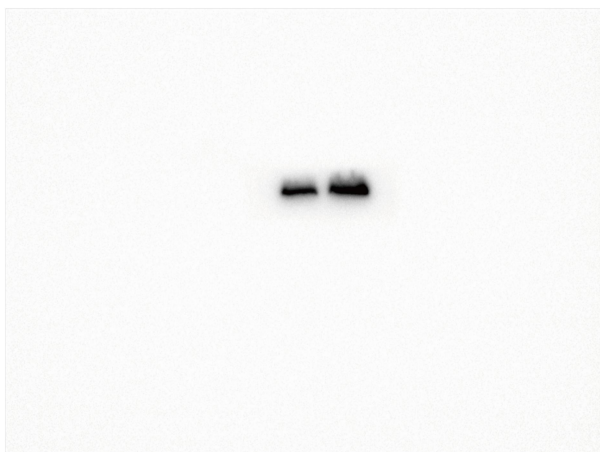



Figure4a

OVCAR3

ZEB2

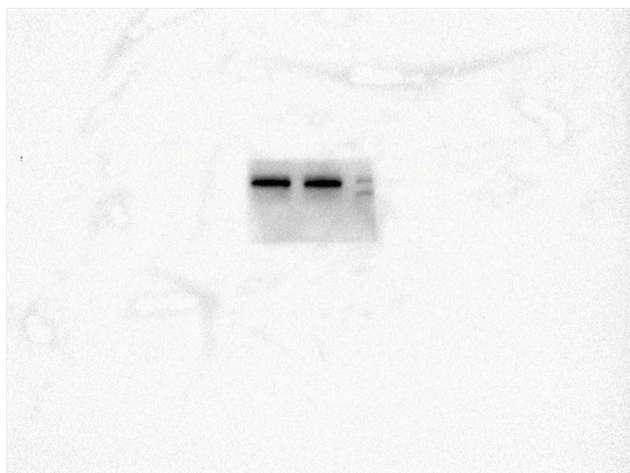

ZEB1

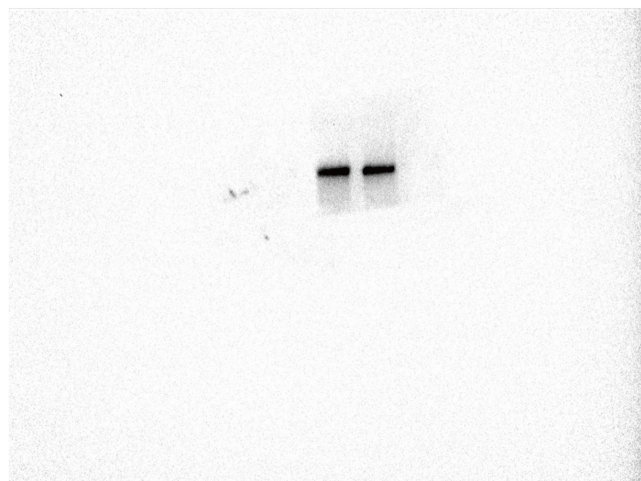

SNAIL

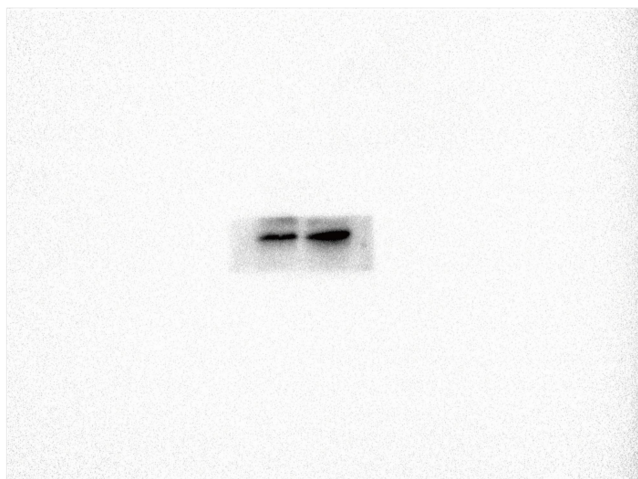

SLUG

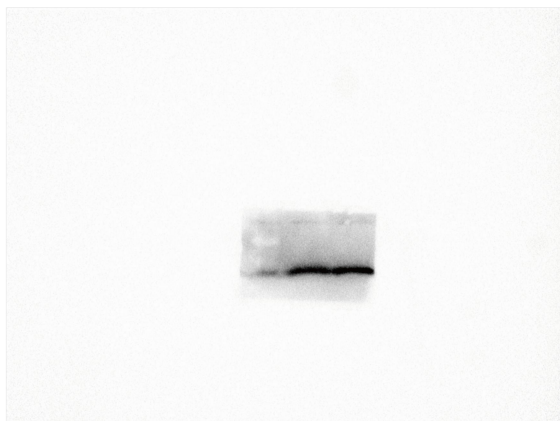

FTO

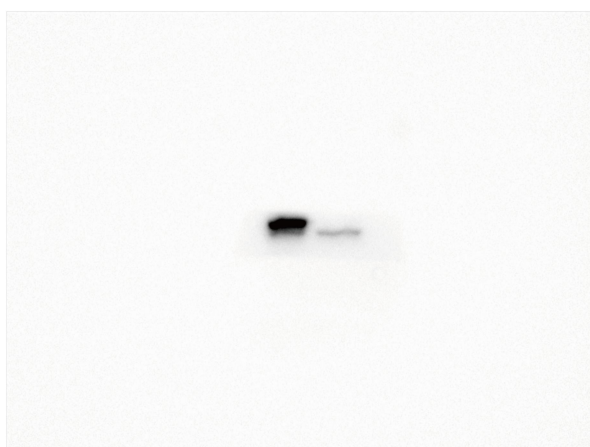

Beta-actin

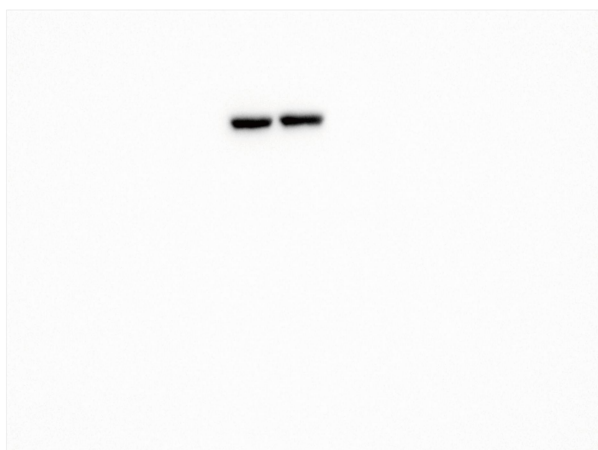

Figure4b

A2780

GAPDH

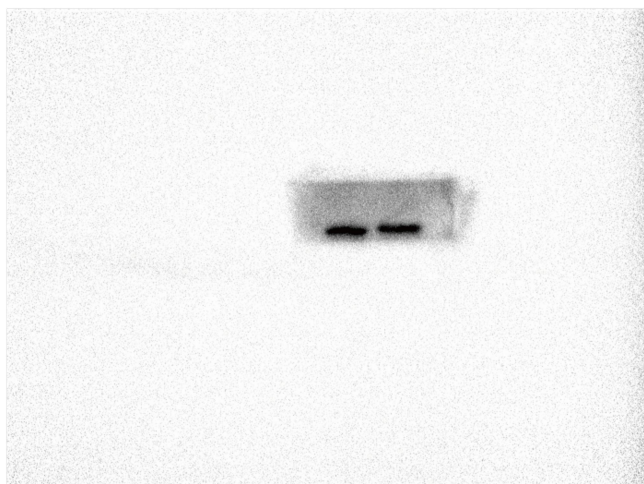

FTO

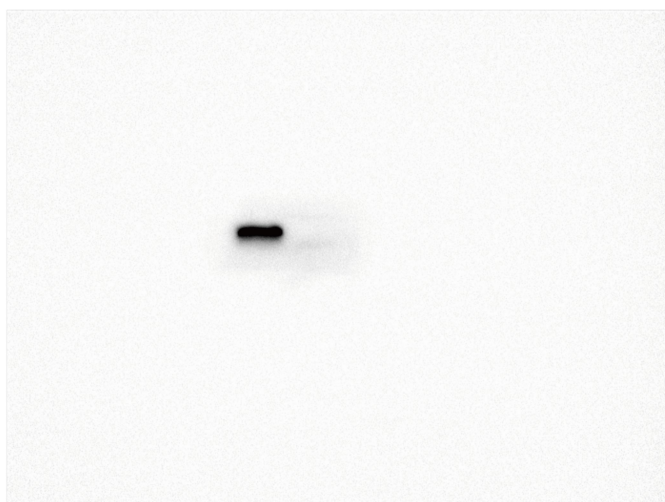

SNAIL

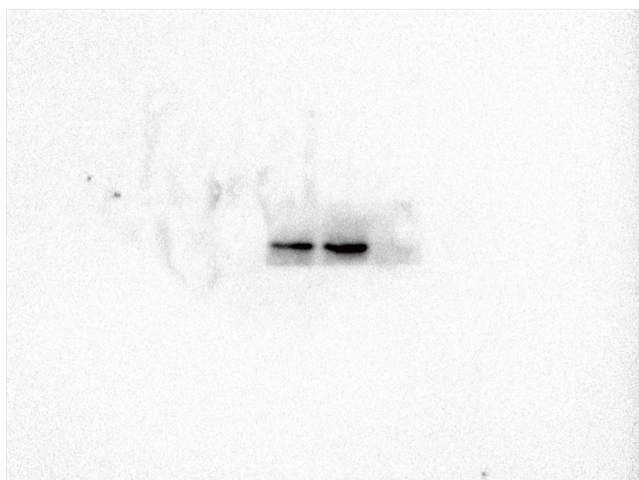

Figure6e  
SNAIL

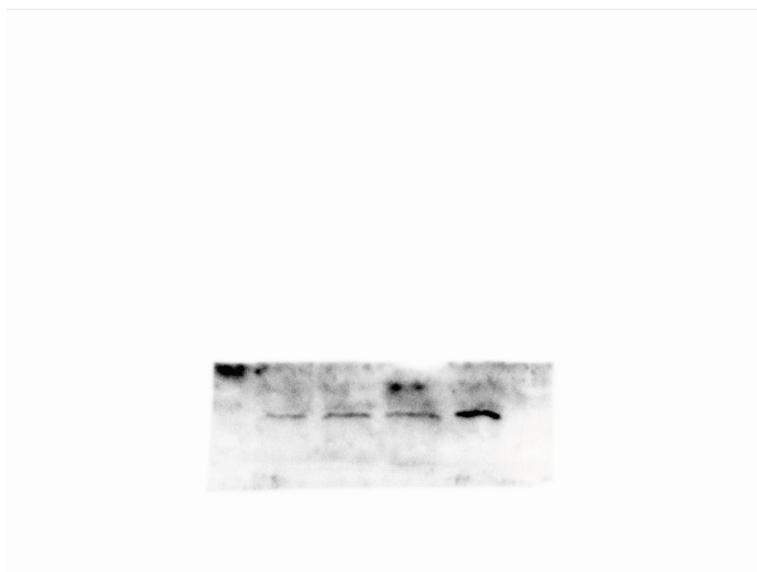

N-cadherin

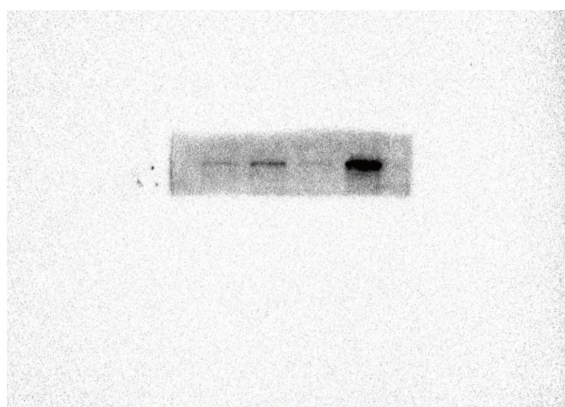

IGF2BP2

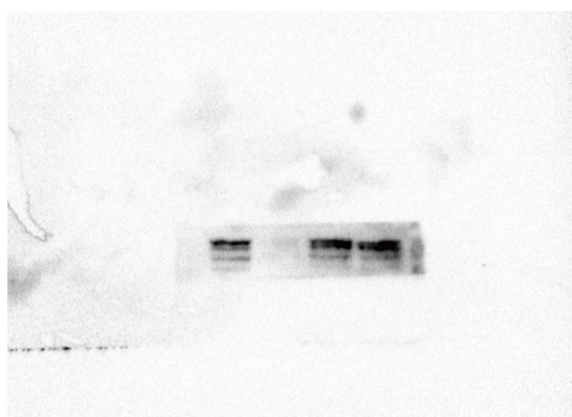

GAPDH

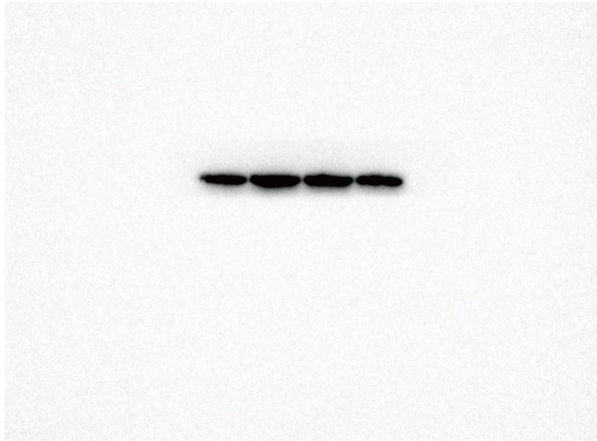

FTO

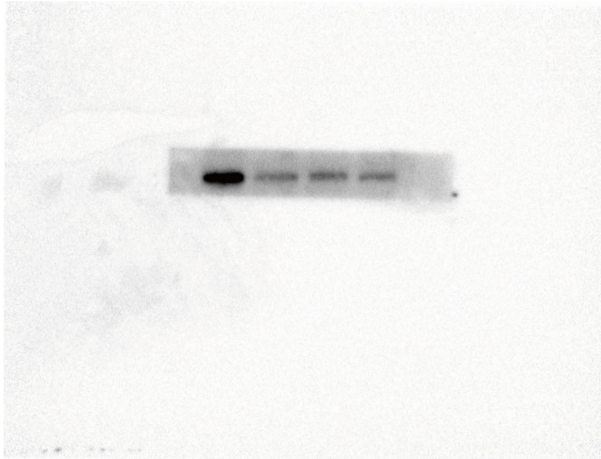

E-cadherin

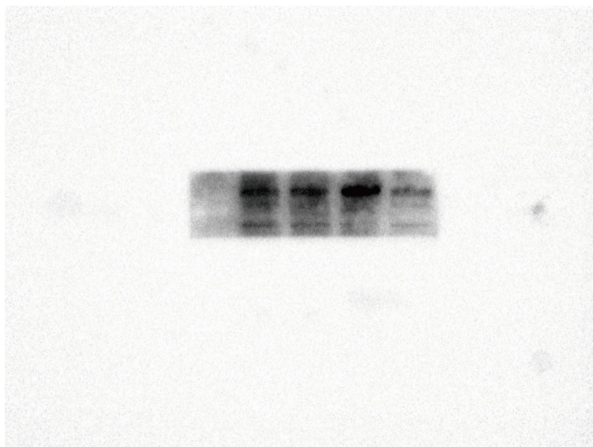



vimentin

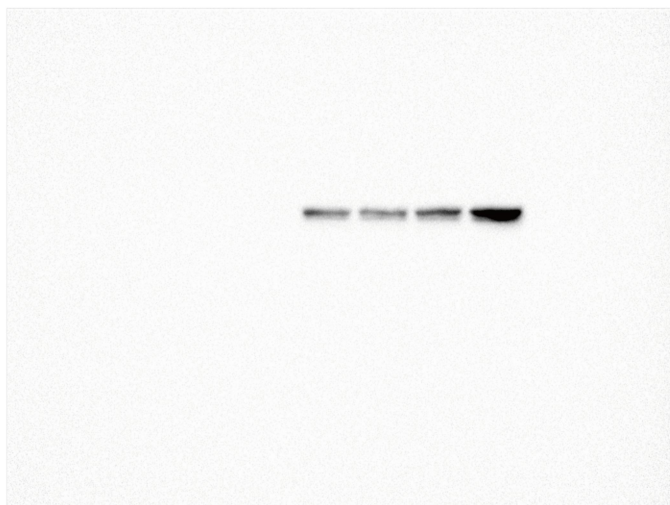

Figure7b

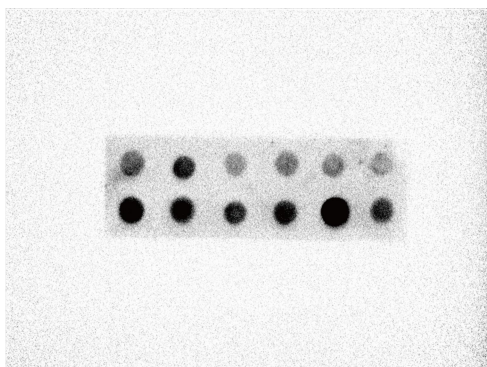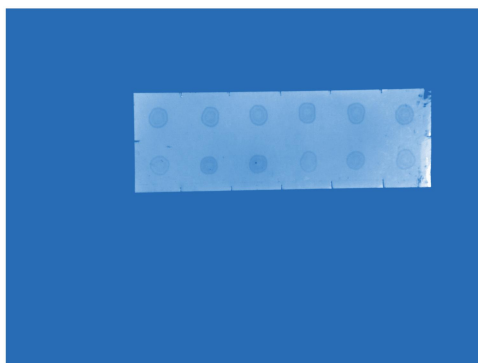

Figure7e

SNAIL

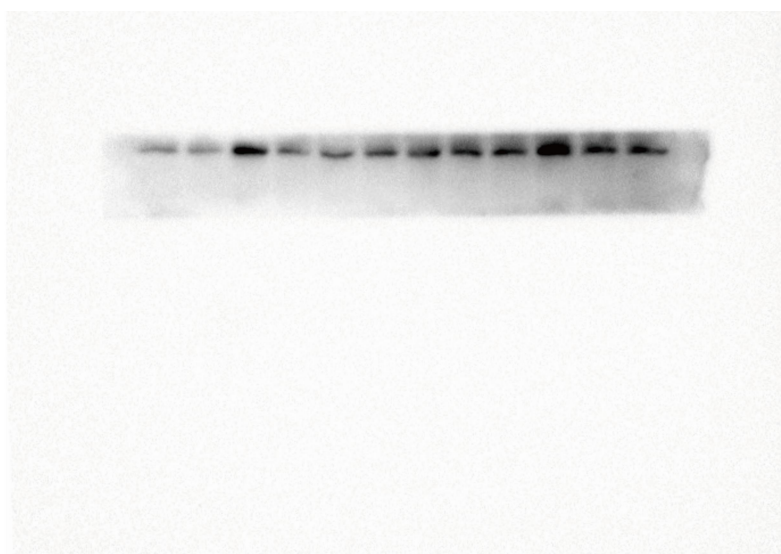

N-cadherin

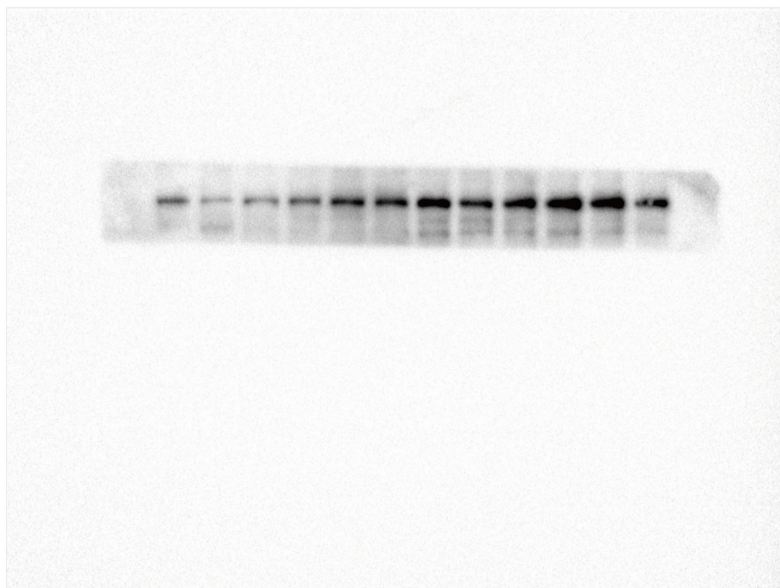

IGF2BP2

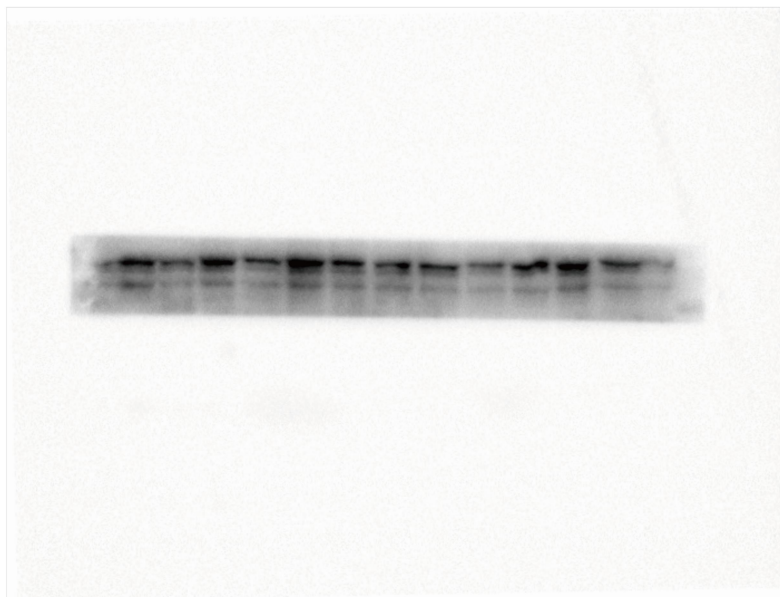



GAPDH

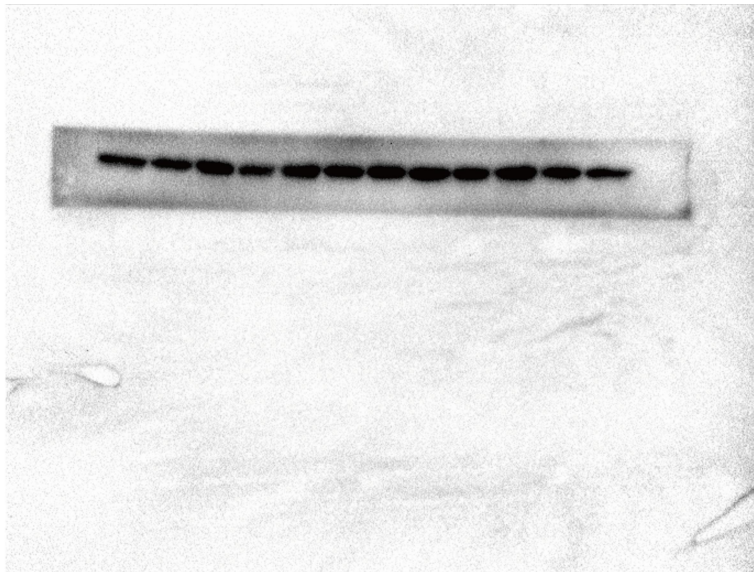

FTO

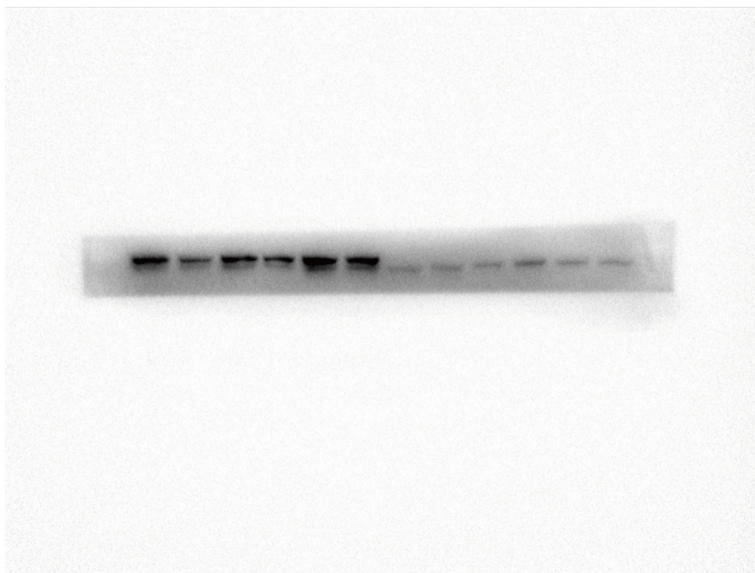

E-cadherin

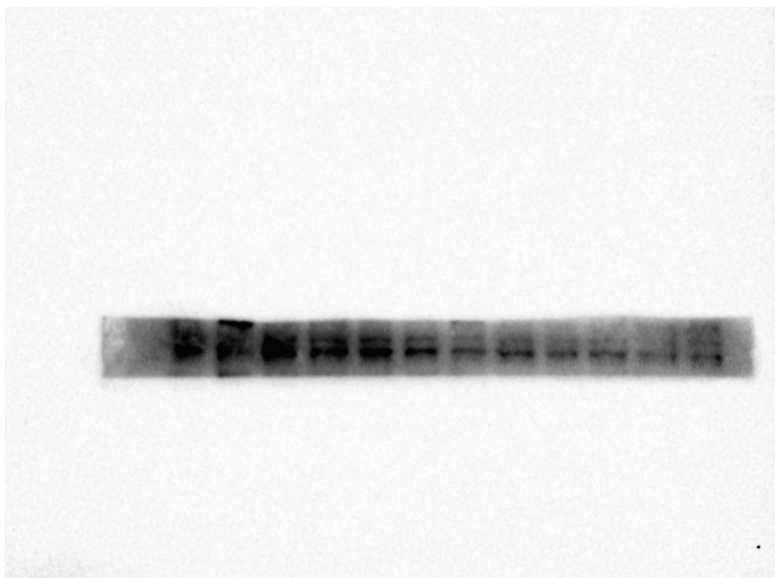

vimentin

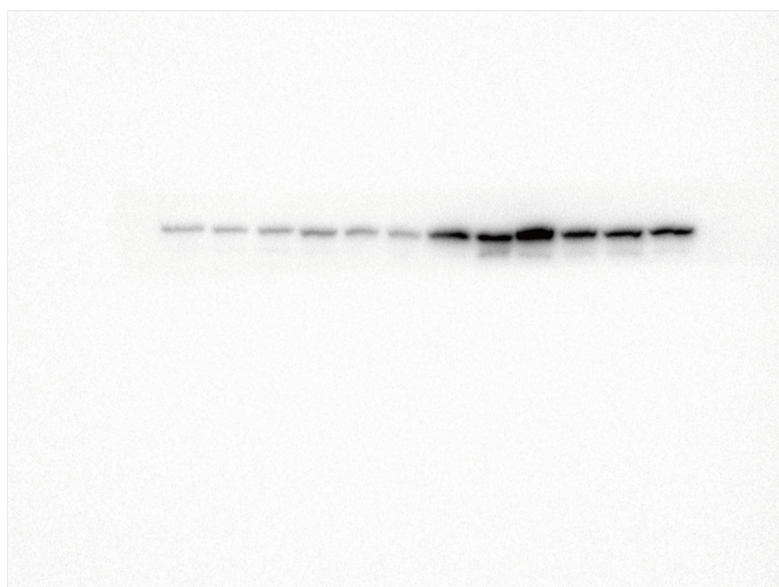

Supplement: s1 [file s1]
