# Supplementary material for: FTO Inhibits Epithelial Ovarian Cancer Progression by Destabilising SNAI1 mRNA through IGF2BP2
Source: MDPI journal article supplement (doi:10.3390/cancers14215218), 2022-10-25
Supplement: s1 [file s1]

|             | Forward (5' to 3')       | Reverse (5' to 3')        |
|-------------|--------------------------|---------------------------|
| GAPDH       | CAGGAGGCATTGCTGATGAT     | GAAGGCTGGGGCTCATTT        |
| FTO         | G TTCACAACCTCGGTTTAGTTC  | CATCATCATTGTCCACATCGTC    |
| SNAI1       | TCTGAGCGGTGAGGGTTAGTGAG  | CACGAAGGAAGAGAAATGGGTAGCC |
| METTL3      | GTCAGGGCTGGGAGACTAGGATG  | CAATGCTGCCTCTGGATTCCGTAG  |
| METTL14     | ACCAAAATCGCCTCCTCCCAAATC | AGCCACCTCTTTCTCCTCGGAAG   |
| WTAP        | AGGGCAACACAACCGAAGATGAC  | ACCACTACCTCCTCTGCCAGTTC   |
| ALKBH5      | TCCTTTCCTTCCCTTCTCCACTG  | TGAAGCGGAGGAGGCACCAG      |
| IGF2BP1     | GATGAAGGCCATCGAAACTTTC   | GGGGTGGAATATTTTCGGATTTG   |
| IGF2BP2     | GATGAACAAGCTTTACATCGGG   | GATTTTCCCATGCAATTCCACT    |
| IGF2BP3     | GAGGCGCTTTCAGGTAAAATAG   | AATGAGGCGGGATATTTTCGTAT   |
| SNAI1-m6A#1 | AGCAGGAAGGACCCACACA      | CAGTGAGAAGGATGTGGG        |
| SNAI1-m6A#2 | GGAGGCGGTGGCAGACTA       | GGGCATCTCAGACTCTAG        |
| SNAI1-m6A#3 | ACTCAGGGGACCCCACTC       | GCCTGAGGGTTCCTTGTG        |
