# Supplementary material for: FTO Inhibits Epithelial Ovarian Cancer Progression by Destabilising SNAI1 mRNA through IGF2BP2
Source: MDPI journal article supplement (doi:10.3390/cancers14215218), 2022-10-25
Supplement: s1 [file s1]

|            | sense (5'-3')         | antisense (5'-3')      |
|------------|-----------------------|------------------------|
| si-FTO#1   | GGCAAUCGAUACAGAAAGUTT | ACUUUCUGUAUCGAUUGCCTT  |
| si-FTO#2   | GUGGCAGUGUACAGUUAUATT | UAUAAUCUGUACACUGCCACTT |
| si-IGF2BP1 | GCUCCCUAUAGCUCCUUUATT | UAAAGGAGCUAUAGGGAGCTT  |
| si-IGF2BP2 | CAGUUUGAGAACUACUCCUTT | AGGAGUAGUUCUCAACUGTT   |
| si-IGF2BP3 | GCUGCUGAGAAGUCGAUUATT | UAAUCGACUUCUCAGCAGCTT  |
| si-SNAI1   | GCCUUCAACUGCAAUACUTT  | AGUAUUUGCAGUUGAAGGCTT  |
